# Supplementary material for: The Impact of Biomaterial Surface Properties on Engineering Neural Tissue for Spinal Cord Regeneration
Source: MDPI journal article supplement (doi:10.3390/ijms241713642), 2023-09-04
Supplement: s1 [file s1]

## Supplementary Data:

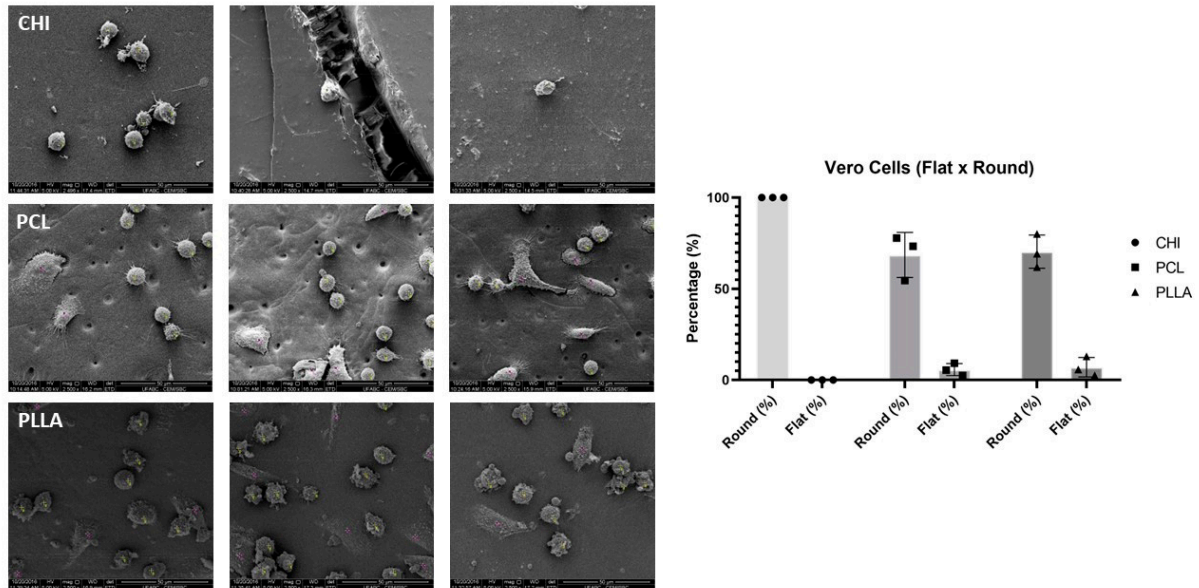

**Supplementary Data S1. Comparison of round and flat VERO cells over scaffolds.** Scanning Electron Microscopy Visualization of chitosan (CHI), poly ( $\epsilon$ - caprolactone (PCL), and poly (L-lactic acid) (PLLA) scaffolds cultured with VERO cells. Comparison between flat and round cells. CHI exhibited an average of 100% round and 0% flat cells. PCL showed an average of 68.55% round and 5.73% flat cells. PLLA exhibited an average of 70.38% round and 7.07% flat cells.

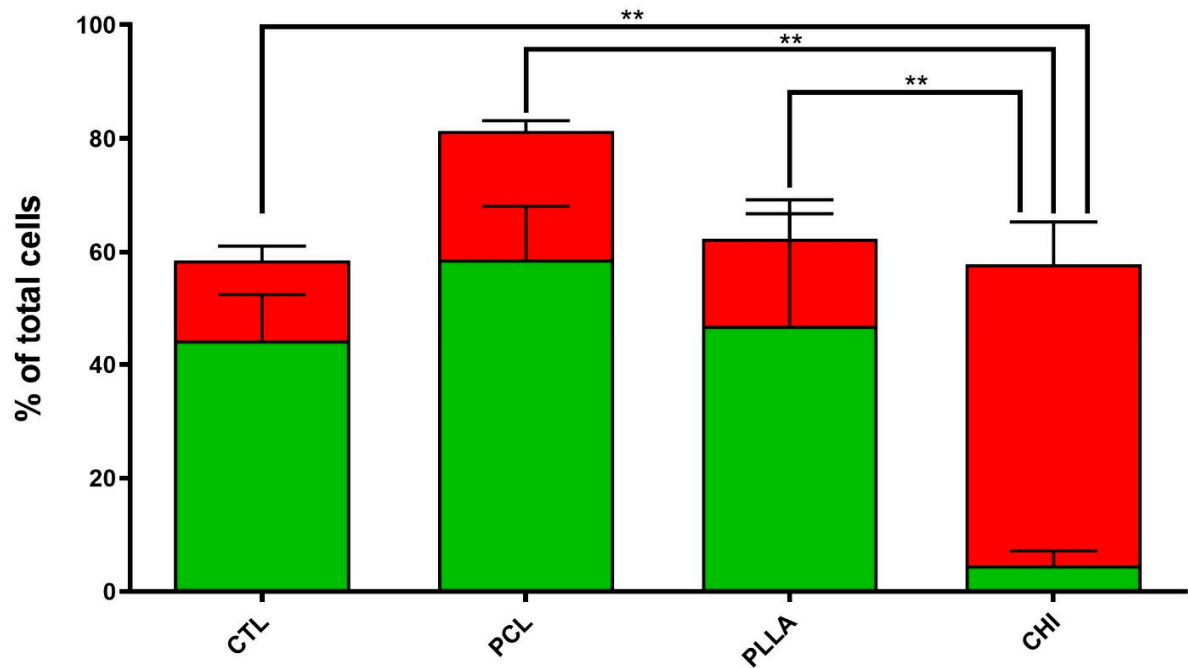

**Supplementary Data S2. Comparison of cells 3D cultured over scaffolds to cells cultured in 2D.** The emergence of  $\beta$ III-tubulin (TUJ1) and glial fibrillary acidic protein (GFAP) in neural progenitor cells derived from human induced pluripotent stem cells (hiPSCs-NPC) cultivated over the scaffolds after DIV 15 in free specific growth factors conditions. Comparison of cells 3D cultured over poly ( $\epsilon$ -caprolactone) (PCL), poly (L-lactic acid) (PLLA), and (D) chitosan (CHI) scaffolds to cells, 2D cultured in a petri dish (CTL). Green represents the percentage of TUJ1 and red represents the percentage of GFAP. Bars represent standard errors of the mean. \*\*  $P < 0.05$ .
